# Supplementary material for: Effect of diabetes mellitus on risk of latent TB infection in a high TB incidence area: a community-based study in Taiwan
Source: PubMed Central journal article supplement — BMJ Open. 2019 Oct 28;9(10):e029948. doi: 10.1136/bmjopen-2019-029948 (PMC6830704; doi:10.1136/bmjopen-2019-029948), 2019-10-28
Supplement: bmjopen-2019-029948supp001.pdf [file bmjopen-2019-029948supp001.pdf]

**Supplementary Table 1. Agreement between TST and QFT-GIT**

| Results           | Overall<br>n = 3217 |                     |                     | DM group<br>n = 2767 |                     |                     | CC group<br>n = 450  |                     |                     |
|-------------------|---------------------|---------------------|---------------------|----------------------|---------------------|---------------------|----------------------|---------------------|---------------------|
|                   | TST cut point       |                     |                     | TST cut point        |                     |                     | TST cut point        |                     |                     |
|                   | 5 mm                | 10 mm               | 15 mm               | 5 mm                 | 10 mm               | 15 mm               | 5 mm                 | 10 mm               | 15 mm               |
| TST+/QFT-GIT+     | 613                 | 528                 | 363                 | 37                   | 32                  | 23                  | 576                  | 496                 | 340                 |
| TST-/QFT-GIT-     | 664                 | 1252                | 1950                | 95                   | 188                 | 318                 | 569                  | 1064                | 1632                |
| TST+/QFT-GIT-     | 1886                | 1298                | 600                 | 311                  | 218                 | 88                  | 1575                 | 1080                | 512                 |
| TST-/QFT-GIT+     | 54                  | 139                 | 304                 | 7                    | 12                  | 21                  | 47                   | 127                 | 283                 |
| Agreement%        | 39.7%               | 55.3%               | 71.9%               | 29.3%                | 48.9%               | 75.8%               | 41.4%                | 56.4%               | 71.3%               |
| Kappa<br>(95% CI) | 0.09<br>(0.74-0.10) | 0.17<br>(0.15-0.20) | 0.27<br>(0.23-0.30) | 0.10<br>(0.08-0.12)  | 0.19<br>(0.16-0.22) | 0.27<br>(0.23-0.31) | 0.02<br>(-0.01-0.05) | 0.06<br>(0.01-0.11) | 0.18<br>(0.09-0.28) |

Abbreviations: TST, tuberculin skin test; QFT-GIT, QuantiFERON-TB Gold In-Tube; CI, confidence interval.

Test results with an indeterminate QFT-GIT response are not included in the table.

**Supplementary Table 2. Combined effects of glycemc control (HbA1c) and duration of DM on risk of latent tuberculosis infection without and with adjustment of TST results.**

| Variables                                | Crude OR (95% CI) | aOR1 (95% CI)    | aOR2 (95% CI)    |
|------------------------------------------|-------------------|------------------|------------------|
| Community comparison group               | Reference         | Reference        | Reference        |
| A1C $\geq 7\%$ , duration >5 years       | 2.49 (1.77-3.52)  | 1.42 (0.97-2.07) | 1.33 (0.90-1.96) |
| A1C $\geq 7\%$ , duration $\leq 5$ years | 2.71 (1.84-3.98)  | 1.87 (1.24-2.82) | 1.80 (1.18-2.74) |
| A1C <7%, duration >5 years               | 2.84 (1.99-4.04)  | 1.67 (1.13-2.46) | 1.54 (1.03-2.28) |
| A1C <7%, duration $\leq 5$ years         | 2.81 (1.95-4.04)  | 1.84 (1.24-2.72) | 1.82 (1.22-2.72) |

Abbreviations: OR, odds ratio; aOR, adjusted odds ratio; CI, confidence interval; TST, tuberculin skin test; A1C, glyated hemoglobin. aOR1: adjusted odds ratio without adjustment of TST results; aOR2: adjusted odds ratio with adjustment of TST results.

\*The multivariable model adjusted for the comorbidities indicated in Table 2.
